# Supplementary material for: Tsunami Sinusitis
Source: Atypon-hosted journal article supplement (doi:10.1056/nejmicm050461), 2005-06-22
Supplement: nejm_limchawalit_e23sa1.pdf [file nejm_limchawalit_e23sa1.pdf]

## Supplementary Appendix

This appendix has been provided by the authors to give readers additional information about their work.

Supplement to: Limchawalit K, Suchato C. Tsunami sinusitis. *N Engl J Med* 2005;352:e23.

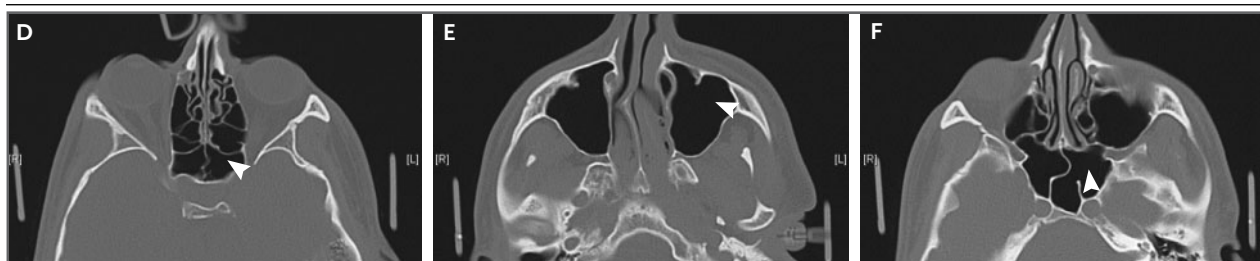

**Supplemental Appendix Figure.** Normally Aerated Ethmoid (Panel D), Maxillary (Panel E), and Sphenoid (Panel F) Sinuses.
